# Supplementary material for: Immune-related adverse events: a retrospective look into the future of oncology in the intensive care unit
Source: Springer Nature journal article supplement (doi:10.1186/s13613-020-00761-w), 2020-10-16

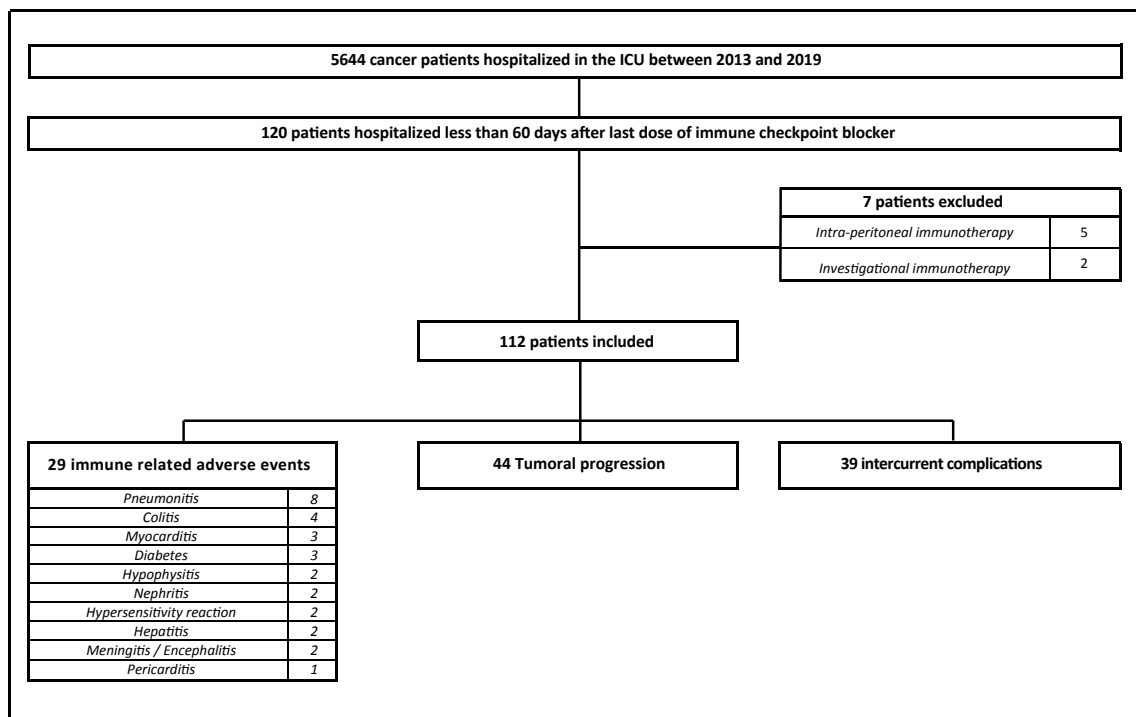

Supplement: MOESM3 [file 18493184]
